# Supplementary material
Source: publisher site journal article supplement (https://www.oncotarget.com/article/28510)
Supplement: Supplementary file 1 [file 28510]

## Addendum

## Addendum: Are anaplastic lymphoma kinase (ALK) and O6-methylguanine-DNA methyltransferase (MGMT) promoter methylation driver biomarkers of pulmonary neuroendocrine tumors (NETs) and carcinomas (NECs)?

**Birgitta Hiddinga<sup>1</sup>, Karen Zwaenepoel<sup>2</sup>, Annelies Janssens<sup>3</sup>, Jan Van Meerbeeck<sup>3</sup> and Patrick Pauwels<sup>2</sup>**

<sup>1</sup>Department of Pulmonary Diseases, University Medical Center Groningen, Groningen, The Netherlands

<sup>2</sup>Department of Pathology, Antwerp University Hospital, Edegem, Belgium

<sup>3</sup>Department of Pulmonology and Thoracic Oncology, European Reference Network for Rare or Low Prevalence Lung Diseases: ERN-LUNG, Antwerp University Hospital, University of Antwerp, Edegem, Belgium

**Published:**

**Copyright:** © 2023 Hiddinga et al. This is an open access article distributed under the terms of the [Creative Commons Attribution License](#) (CC BY 4.0), which permits unrestricted use, distribution, and reproduction in any medium, provided the original author and source are credited.

**This article has an addendum:** No funding was used for this publication.

Original article: Oncotarget. 2022; 13:800–809. <https://doi.org/10.18632/oncotarget.28240>
